# Supplementary material for: Para–ferroelectric phase transition induces an excellent second harmonic generation response and a prominent switchable dielectric constant change based on a metal-free ionic crystal
Source: Royal Society of Chemistry journal article supplement (doi:10.1039/d1ce00680k), 2021-01-01
Supplement: d1ce00680k1.pdf [file d1ce00680k1.pdf]

## *Electronic Supplementary Materials (ESI)*

### **Para-Ferroelectric Phase Transition Induces Excellent Second Harmonic Generation Response and Prominent Switchable Dielectric Constant Change based on a Metal-Free Ionic Crystal**

**Ding-Chong Han, Yu-Kong Li, Yao Liu, Yu-Hui Tan\*, Yun-Zhi Tang\*, Wen-Juan Wei, Peng-Kang Du, Hao Zhang**

\*Faculty of Materials Metallurgy and Chemistry, Jiangxi University of Science and Technology, Ganzhou 341000, Jiangxi Province, P. R. China

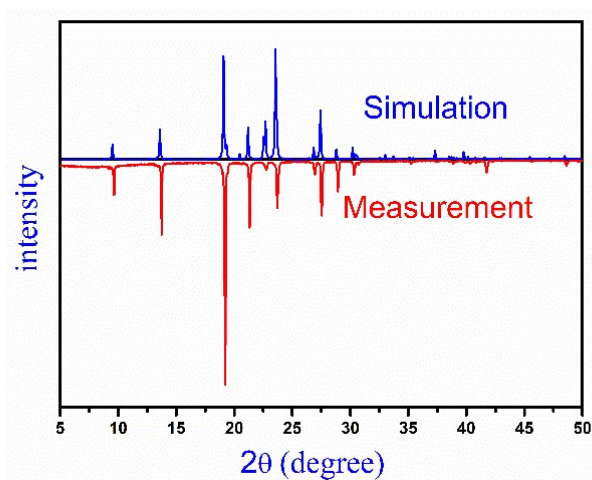

**Fig. S1.** PXRD (powder x-ray diffraction) measurement comparison with single crystal simulation of compound **1** at room temperature.

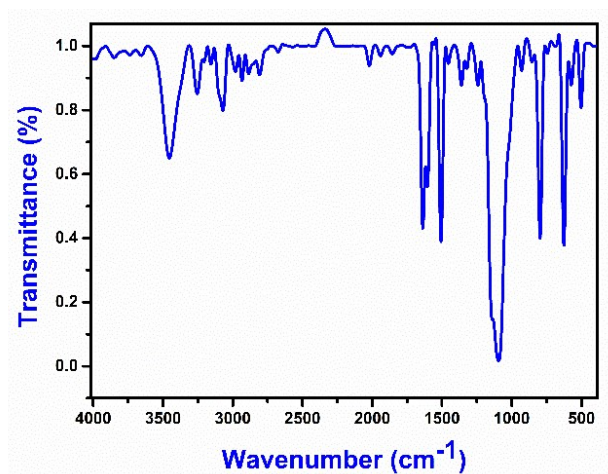

**Fig. S2.** The infrared (IR) spectra of solid compound **1** at room temperature.

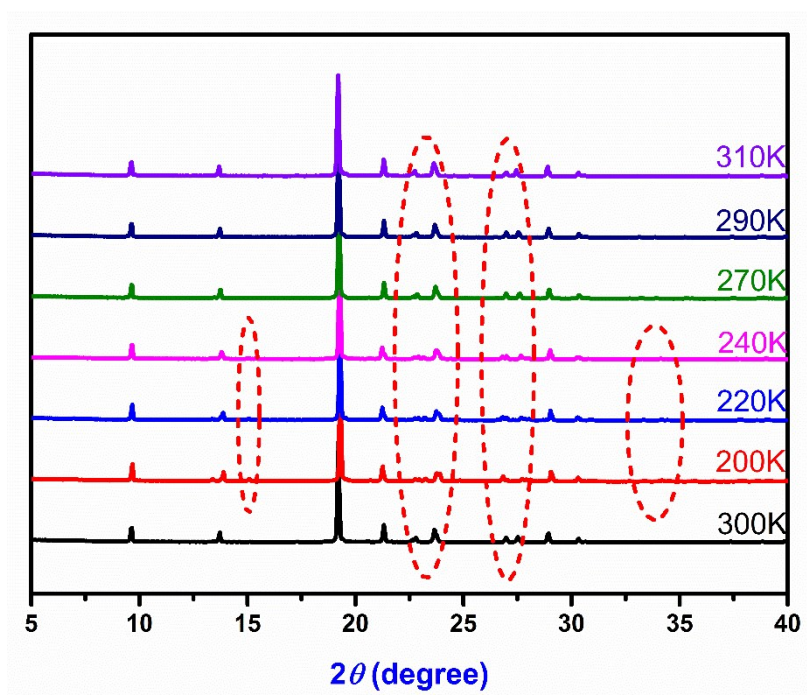

**Fig. S3.** The Variable-Temperature PXRD of compound **1** at different temperatures (200 K, 220 K, 240 K, 270 K, 290 K, 300 K, 310 K).

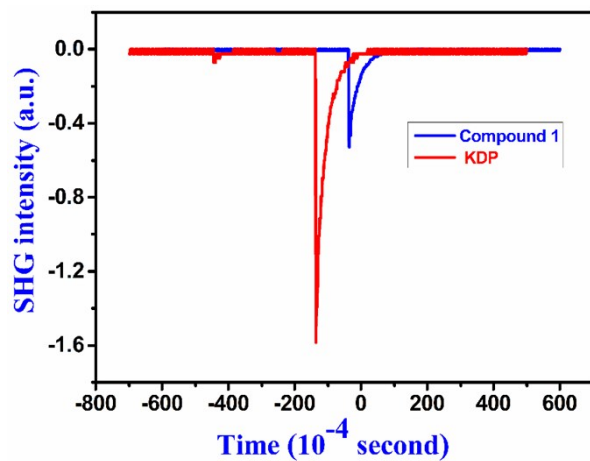

**Fig. S4.** The comparison of KDP, SHG response at **1-LTP** under the same condition.

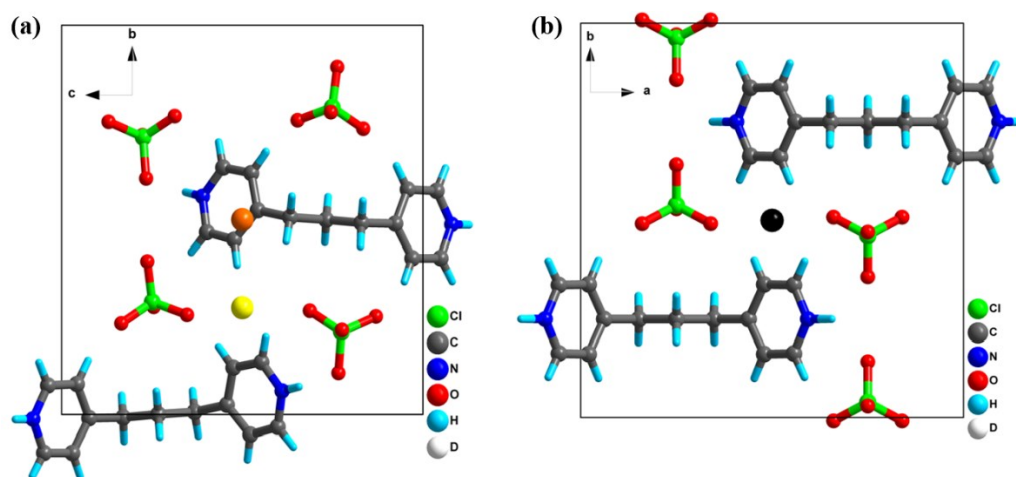

**Fig. S5.** The positive and negative charge centers of **1-LTP** (a) and **1-HTP** (b).

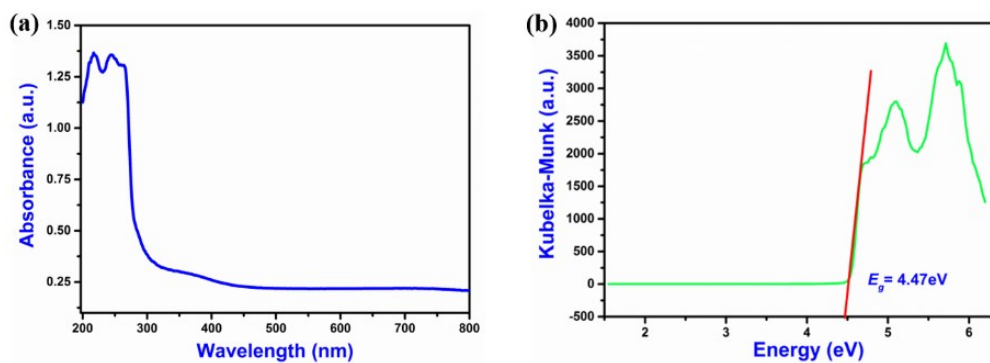

**Fig. S6.** UV-vis absorption spectrum at 293 K (a) and the optical bandgap calculation diagrams of compound **1** (b).

**Table S1.** The crystallographic data and structure refinements for compound **1** at 240K and 293K.

| Temperature                                                                  | 240 K                                                                         | 293 K                                                                         |
|------------------------------------------------------------------------------|-------------------------------------------------------------------------------|-------------------------------------------------------------------------------|
| Empirical formula                                                            | C <sub>13</sub> H <sub>16</sub> Cl <sub>2</sub> N <sub>2</sub> O <sub>8</sub> | C <sub>13</sub> H <sub>16</sub> Cl <sub>2</sub> N <sub>2</sub> O <sub>8</sub> |
| Formula weight                                                               | 399.18                                                                        | 399.18                                                                        |
| Crystal system                                                               | monoclinic                                                                    | orthorhombic                                                                  |
| Space group                                                                  | <i>P</i> 2 <sub>1</sub>                                                       | <i>P</i> 2 <sub>1</sub> 2 <sub>1</sub> 2                                      |
| <i>a</i> (Å)                                                                 | 4.8478(2)                                                                     | 13.0155(7)                                                                    |
| <i>b</i> (Å)                                                                 | 13.3356(5)                                                                    | 13.2744(7)                                                                    |
| <i>c</i> (Å)                                                                 | 12.8520(5)                                                                    | 4.9013(2)                                                                     |
| $\alpha$ (°)                                                                 | 90                                                                            | 90.00                                                                         |
| $\beta$ (°)                                                                  | 90.731(4)                                                                     | 90.00                                                                         |
| $\gamma$ (°)                                                                 | 90                                                                            | 90.00                                                                         |
| <i>V</i> (Å <sup>3</sup> )                                                   | 830.79(6)                                                                     | 846.81(7)                                                                     |
| <i>Z</i>                                                                     | 2                                                                             | 2                                                                             |
| Density (g/cm <sup>3</sup> )                                                 | 1.596                                                                         | 1.566                                                                         |
| <i>m</i> (mm <sup>-1</sup> )                                                 | 0.437                                                                         | 0.429                                                                         |
| <i>F</i> (000)                                                               | 412.0                                                                         | 412.0                                                                         |
| Data/restraints/parameters                                                   | 4787/1/226                                                                    | 1483/35/115                                                                   |
| GOF                                                                          | 1.047                                                                         | 1.182                                                                         |
| <i>R</i> <sub>1</sub> , w <i>R</i> <sub>2</sub> [ <i>I</i> ≥ 2σ( <i>I</i> )] | <i>R</i> <sub>1</sub> = 0.0537, w <i>R</i> <sub>2</sub> =<br>0.1407           | <i>R</i> <sub>1</sub> = 0.0657, w <i>R</i> <sub>2</sub> =<br>0.1970           |
| <i>R</i> <sub>1</sub> , w <i>R</i> <sub>2</sub> (all data)                   | <i>R</i> <sub>1</sub> = 0.0611, w <i>R</i> <sub>2</sub> =<br>0.1452           | <i>R</i> <sub>1</sub> = 0.0766, w <i>R</i> <sub>2</sub> =<br>0.2120           |
| $\Delta\rho_{\max}/\Delta\rho_{\min}$ (eÅ <sup>-3</sup> )                    | 0.52/-0.55                                                                    | 0.67/-0.62                                                                    |

## Calculation of $\Delta S$ and N

In the heating cycle mode

$$\Delta S_1 = R \ln N_1$$

$$\Delta S_1 = \int_{T_2}^{T_1} \frac{Q}{T} dT$$

$$\approx \frac{\Delta H}{T_c}$$

$$= \frac{4.2430 J^{-1} mol \times 399.18 g^{-1} mol}{256.19 K}$$

$$= 6.61 J \cdot mol^{-1} \cdot K^{-1}$$

$$N_1 = \exp\left(\frac{\Delta S_1}{R}\right) = \exp\left(\frac{6.61 J \cdot mol^{-1} \cdot K^{-1}}{8.314 J \cdot mol^{-1} \cdot K^{-1}}\right)$$

$$= 2.22$$

**In the cooling cycle mode**

$$\Delta S_2 = R \ln N_2$$

$$\Delta S_1 = \int_{T_2}^{T_1} \frac{Q}{T} dT$$

$$\approx \frac{\Delta H}{T_c}$$

$$= \frac{4.7325 J^{-1} mol \times 399.18 g^{-1} mol}{252.09 K}$$

$$= 7.494 J \cdot mol^{-1} \cdot K^{-1}$$

$$N_2 = \exp\left(\frac{\Delta S_1}{R}\right) = \exp\left(\frac{7.494 J \cdot mol^{-1} \cdot K^{-1}}{8.314 J \cdot mol^{-1} \cdot K^{-1}}\right)$$

$$= 2.46$$
